# Supplementary material
Source: PubMed Central journal article supplement (PMC6075666)
Supplement: NIHMS846760-supplement-Supplemental.pdf [file NIHMS846760-supplement-Supplemental.pdf]

1 **Supporting Information**

2

3 **Identification and Toxicological Evaluation of Unsubstituted PAHs**

4 **and Novel PAH Derivatives in Pavement Sealcoat Products**

5

6 Ivan Titaley,<sup>a</sup> Anna Chlebowski,<sup>b</sup> Lisa Truong,<sup>b</sup> Robert L. Tanguay,<sup>b</sup> and Staci L. Massey

7 Simonich<sup>a,b\*</sup>

8 <sup>a</sup>Department of Chemistry, Oregon State University, Corvallis, OR, 97331, USA

9 <sup>b</sup>Department of Environmental and Molecular Toxicology, Oregon State University, Corvallis,

10 OR, 97331, USA

11 \*Corresponding Author ([staci.simonich@oregonstate.edu](mailto:staci.simonich@oregonstate.edu)), phone: (541) 737-9194,

12 fax: (541) 737-0497

13

14 **SI contains:**

15 18 pages

16 3 tables

17 6 figures

18 **Content:**

19 Sample Collection.....3

20 Sample Analysis.....4

21 Quality assurance/quality control (QA/QC) .....5

22 **Table S1.** Mean concentrations of individual PAH analyzed in this study for all samples .....6

23 **Figure S1.** Comparison of measured PAHs concentrations between USGS study (2012) and this

24 study .....10

25 **Table S2.** List of PAHs and MW302-PAHs in sealcoat products with their corresponding draft

26 RPF and PEF values.....11

27 **Table S3.** List of PAHs and MW302-PAHs in CT-1 time point scrapes with their corresponding

28 draft RPF and PEF values .....11

29 **Figure S2.** Nitro- and Oxy-PAHs derivative products concentration post sealcoat application...13

30 **Figure S3.** Direct and indirect acting Ames mutagenicity data of F1-F11 of all sealcoat products

31 analyzed at 1:100 dilution.....14

32 **Figure S4.** Direct and indirect acting Ames mutagenicity data of F1-F11 of CT-1 time point

33 scrapes analyzed at 1:100 dilution .....15

34 **Figure S5.** EC<sub>50</sub> concentration of pavement sealcoat products calculated from the Zebrafish

35 developmental toxicity testing data .....16

36 **Figure S6.** EC<sub>50</sub> concentration of CT-1 time point scrapes calculated from the Zebrafish

37 developmental toxicity testing data .....17

38 **Sample Collection**

39 CT-1 product was collected from a 125 mL jar of commercially available product that  
40 was obtained from the commercial applicator during application.<sup>1</sup> CT-2 and AS products were  
41 collected from 5 gallon buckets after they were first stirred with a wooden stick, similar to paint  
42 stirrer. Each product was applied to a 12 square inches glass sheets that have been pre-cleaned  
43 with methanol. The application was done with a new natural bristle paint brush and each glass  
44 was dried in a dark room.

45 **Sample Analysis**

46 PAHs, MPAHs, and Hetero-PAHs were analyzed in electron impact ionization mode, and  
47 NPAHs and OPAHs were analyzed in electron capture negative ionization mode with a  
48 programmed temperature vaporization inlet (Gerstel, Germany) using previously described  
49 methods.<sup>2,3</sup> All analyses were run in selected ion monitoring mode with triplicate injections.  
50 Limits of detection ranged from 0.005 to 1.3 mg [PAH]/kg sealcoat.

51 GC/MS analyses for all analytes, except MW302-PAHs, were performed using an  
52 Agilent 6890 GC coupled with a 5973N mass selective detector and an Agilent DB-5MS  
53 (30 m × 0.25 mm I.D. × 0.25 μm film thickness) capillary column. For the MW302-PAHs, an  
54 Agilent DB-17MS (60 m × 0.25 mm I.D. × 0.25 μm film thickness) capillary column was  
55 used.<sup>4,5</sup> MW302-PAHs were also analyzed in electron impact ionization mode,<sup>4</sup> but with a slight  
56 modification to the oven programming that included a 45°C/min ramp to 200°C and a 15-min  
57 isothermal hold at 320°C.

58 **Quality assurance/quality control (QA/QC)**

59           Field replicates were obtained by collecting scrapes from five different spots in the  
60 parking lot.<sup>1</sup> Instrument replicates were obtained by triplicate injection for every analyzed  
61 sample. The results given in Table S1 are derived from the mean of the triplicate injections. Our  
62 results were compared to results from Van Metre, et al. (2012) (Figure S1). The limit of  
63 detection (LOD) was estimated for each compound using a signal to noise ratio of 3:1. The limit  
64 of quantitation (LOQ) was estimated for each compound using a signal to noise ratio of 10:1.

| <b>Sample</b> | <b>CT-1<br/>(mg/kg)</b> | <b>CT-2<br/>(mg/kg)</b> | <b>AS<br/>(mg/kg)</b> | <b>1.6 h<br/>(mg/kg)</b> | <b>1 d<br/>(mg/kg)</b> | <b>45 d<br/>(mg/kg)</b> | <b>149 d<br/>(mg/kg)</b> | <b>LOD<br/>(mg/kg)</b> | <b>LOQ<br/>(mg/kg)</b> |
|---------------|-------------------------|-------------------------|-----------------------|--------------------------|------------------------|-------------------------|--------------------------|------------------------|------------------------|
| NAP           | 1                       | 130                     | 1                     | 1                        | 4                      | 1                       | 0.5                      | 0.005                  | 0.02                   |
| ACY           | 4                       | 5                       | <LOD                  | 5                        | 6                      | 2                       | 2                        | 0.035                  | 0.1                    |
| ACE           | 140                     | 740                     | 2.5                   | 89                       | 170                    | 6                       | 1                        | 0.035                  | 0.1                    |
| FLO           | 620                     | 2,300                   | 4.5                   | 370                      | 1,300                  | 30                      | 7                        | 0.005                  | 0.02                   |
| DBT           | 350                     | 740                     | 1                     | 230                      | 430                    | 46                      | 24                       | 0.005                  | 0.02                   |
| PHE           | 8,300                   | 45,000                  | 14                    | 16,000                   | 56,000                 | 2,300                   | 1,200                    | 0.005                  | 0.02                   |
| ANT           | 2,500                   | 4,700                   | 7                     | 2,800                    | 4,600                  | 100                     | 25                       | 0.005                  | 0.02                   |
| FLA           | 6,800                   | 31,000                  | 3                     | 20,000                   | 71,000                 | 6,400                   | 4,900                    | 0.005                  | 0.02                   |
| PYR           | 5,600                   | 33,000                  | 4                     | 20,000                   | 68,000                 | 6,200                   | 4,700                    | 0.005                  | 0.02                   |
| RET           | 10                      | 5                       | 2                     | 10                       | 9                      | 4                       | <LOD                     | 0.005                  | 0.02                   |
| BcFlo         | 120                     | 160                     | 0.2                   | 140                      | 210                    | 80                      | 62                       | 0.002                  | 0.01                   |
| CPP           | 10                      | 9                       | <LOD                  | 3                        | 4                      | 2                       | 7                        | 0.005                  | 0.02                   |
| BaA           | 2,400                   | 2,800                   | 0.8                   | 4,000                    | 15,000                 | 1,300                   | 770                      | 0.005                  | 0.02                   |
| CHR+TRI       | 1,600                   | 1,300                   | 3                     | 3,100                    | 3,700                  | 1,500                   | 1,400                    | 0.003                  | 0.01                   |
| BbF           | 2,700                   | 2,500                   | 2                     | 5,400                    | 4,600                  | 2,100                   | 2,300                    | 0.005                  | 0.02                   |
| BkF           | 1,100                   | 900                     | 0.04                  | 2,000                    | 1,900                  | 890                     | 940                      | 0.005                  | 0.02                   |
| Bj+eA         | <LOD                    | 2                       | <LOD                  | <LOD                     | <LOD                   | <LOD                    | <LOD                     | 0.005                  | 0.02                   |
| BeP           | 1,600                   | 1,300                   | 3                     | 2,600                    | 2,700                  | 1,200                   | 1,100                    | 0.005                  | 0.02                   |
| BaP           | 3,000                   | 1,800                   | 0.4                   | 4,300                    | 5,200                  | 1,900                   | 1,800                    | 0.005                  | 0.02                   |
| DBah+acA      | 71                      | 30                      | <LOQ                  | 40                       | 52                     | 19                      | 27                       | 0.005                  | 0.02                   |
| IcdPY         | 1,500                   | 970                     | 0.7                   | 1,000                    | 2,300                  | 610                     | 750                      | 0.005                  | 0.02                   |
| BghiP         | 21                      | 66                      | 0.6                   | 11                       | 280                    | 48                      | 3                        | 0.005                  | 0.02                   |
| ANH           | 470                     | 220                     | 0.8                   | 470                      | 620                    | 69                      | 90                       | 0.005                  | 0.02                   |
| 2-MNAP        | 8                       | 140                     | 4                     | 8                        | 9                      | <LOD                    | <LOD                     | 0.035                  | 0.1                    |
| 1-MNAP        | 8                       | 86                      | 4                     | 8                        | 8                      | <LOD                    | <LOD                     | 0.035                  | 0.1                    |
| 2,6-DMNAP     | 4                       | 46                      | 0.5                   | 3                        | 6                      | <LOD                    | <LOD                     | 0.035                  | 0.1                    |
| 1,3-DMNAP     | 4                       | 48                      | 0.5                   | 3                        | 6                      | <LOD                    | <LOD                     | 0.035                  | 0.1                    |

| <b>Sample</b> | <b>CT-1<br/>(mg/kg)</b> | <b>CT-2<br/>(mg/kg)</b> | <b>AS<br/>(mg/kg)</b> | <b>1.6 h<br/>(mg/kg)</b> | <b>1 d<br/>(mg/kg)</b> | <b>45 d<br/>(mg/kg)</b> | <b>149 d<br/>(mg/kg)</b> | <b>LOD<br/>(mg/kg)</b> | <b>LOQ<br/>(mg/kg)</b> |
|---------------|-------------------------|-------------------------|-----------------------|--------------------------|------------------------|-------------------------|--------------------------|------------------------|------------------------|
| 2-MPHE        | 540                     | 920                     | 4                     | 460                      | 1,400                  | 170                     | 110                      | 0.035                  | 0.1                    |
| 2-MANT        | 210                     | 340                     | <LOD                  | 110                      | 250                    | 18                      | <LOD                     | 0.035                  | 0.1                    |
| 1-MPHE        | 320                     | 500                     | 1.4                   | 270                      | 480                    | 92                      | 62                       | 0.035                  | 0.1                    |
| 3,6-DMPHE     | 46                      | 63                      | 3                     | 44                       | 59                     | 18                      | 15                       | 0.006                  | 0.02                   |
| 1-MPYR        | 1,500                   | 2,100                   | 0.5                   | 2,200                    | 3,100                  | 340                     | 180                      | 0.005                  | 0.02                   |
| 6-MCHR        | 58                      | 46                      | 2                     | 48                       | 76                     | 27                      | 22                       | 0.005                  | 0.02                   |
| N23bF         | 38                      | 16                      | <LOD                  | 50                       | 36                     | 25                      | 32                       | 0.035                  | 0.1                    |
| DBae+bkF      | 370                     | 120                     | <LOD                  | 360                      | 280                    | 220                     | 280                      | 0.035                  | 0.1                    |
| DBakF         | 200                     | 68                      | <LOD                  | 160                      | 110                    | 29                      | 27                       | 0.1                    | 0.3                    |
| DBjIF         | 370                     | 19                      | <LOD                  | 650                      | 490                    | 350                     | 500                      | 0.05                   | 0.2                    |
| DBalP         | 15                      | 7                       | <LOD                  | 13                       | 8                      | 1                       | 1                        | 0.05                   | 0.2                    |
| N23kF         | 250                     | 180                     | <LOD                  | 460                      | 310                    | 77                      | 130                      | 0.5                    | 1.7                    |
| N23eP         | 66                      | 24                      | <LOD                  | 72                       | 54                     | 41                      | 47                       | 0.035                  | 0.1                    |
| DBaeP         | 160                     | 46                      | <LOD                  | 150                      | 97                     | 83                      | 110                      | 0.005                  | 0.02                   |
| COR           | 120                     | 36                      | <LOD                  | 130                      | 120                    | 94                      | 110                      | 0.03                   | 0.1                    |
| DBaiP         | 120                     | 44                      | <LOD                  | 80                       | 61                     | 38                      | 44                       | 0.05                   | 0.2                    |
| DBahP         | 250                     | 110                     | <LOD                  | 69                       | 41                     | 25                      | 29                       | 0.1                    | 0.3                    |
| 2-MBF         | <LOD                    | <LOD                    | <LOD                  | <LOD                     | <LOD                   | <LOD                    | <LOD                     | 0.004                  | 0.01                   |
| THI           | <LOD                    | 4                       | <LOD                  | <LOD                     | <LOD                   | <LOD                    | <LOD                     | 0.02                   | 0.07                   |
| QUIN          | <LOD                    | <LOD                    | <LOD                  | <LOD                     | <LOD                   | <LOD                    | <LOD                     | 0.008                  | 0.03                   |
| IND           | 1                       | 6                       | 0.3                   | <LOD                     | <LOD                   | <LOD                    | <LOD                     | 0.05                   | 0.2                    |
| 8-MQN         | <LOD                    | <LOD                    | <LOD                  | <LOD                     | <LOD                   | <LOD                    | <LOD                     | 0.007                  | 0.02                   |
| DBF           | 380                     | 1,000                   | 3                     | 100                      | 210                    | 4                       | 1                        | 0.03                   | 0.1                    |
| XAN           | <LOD                    | <LOD                    | <LOD                  | <LOD                     | <LOD                   | <LOD                    | <LOD                     | 0.01                   | 0.03                   |
| 5,6-BQN       | <LOD                    | 7                       | <LOD                  | 3                        | 5                      | 1                       | 0.3                      | 0.01                   | 0.03                   |
| ACR           | <LOD                    | 1                       | <LOD                  | <LOD                     | <LOD                   | <LOD                    | <LOD                     | 0.05                   | 0.2                    |
| CARB          | 1,500                   | 2,800                   | 1                     | 740                      | 540                    | 150                     | 67                       | 0.05                   | 0.2                    |
| 1-NN          | <LOD                    | <LOQ                    | <LOD                  | <LOD                     | <LOD                   | <LOD                    | <LOD                     | 0.007                  | 0.02                   |
| 2-NN          | <LOD                    | 0.3                     | <LOD                  | <LOD                     | <LOD                   | <LOD                    | <LOD                     | 0.007                  | 0.02                   |

| <b>Sample</b> | <b>CT-1<br/>(mg/kg)</b> | <b>CT-2<br/>(mg/kg)</b> | <b>AS<br/>(mg/kg)</b> | <b>1.6 h<br/>(mg/kg)</b> | <b>1 d<br/>(mg/kg)</b> | <b>45 d<br/>(mg/kg)</b> | <b>149 d<br/>(mg/kg)</b> | <b>LOD<br/>(mg/kg)</b> | <b>LOQ<br/>(mg/kg)</b> |
|---------------|-------------------------|-------------------------|-----------------------|--------------------------|------------------------|-------------------------|--------------------------|------------------------|------------------------|
| 2-NBP         | <LOD                    | <LOD                    | <LOD                  | <LOD                     | <LOD                   | <LOD                    | <LOD                     | 0.007                  | 0.02                   |
| 3-NBP         | <LOD                    | <LOD                    | <LOD                  | <LOD                     | <LOD                   | <LOD                    | <LOD                     | 0.007                  | 0.02                   |
| 4-NBP         | <LOD                    | <LOD                    | <LOD                  | <LOD                     | <LOD                   | <LOD                    | <LOD                     | 0.05                   | 0.2                    |
| 3-NBF         | <LOD                    | <LOD                    | <LOD                  | <LOD                     | <LOD                   | <LOD                    | <LOD                     | 0.01                   | 0.03                   |
| 5-NAC         | <LOD                    | <LOD                    | <LOD                  | <LOD                     | <LOD                   | <LOD                    | <LOD                     | 0.02                   | 0.07                   |
| 2-NFL         | <LOD                    | <LOD                    | <LOD                  | <LOD                     | <LOD                   | <LOD                    | <LOD                     | 0.007                  | 0.02                   |
| 9-NAN         | 1                       | <LOD                    | <LOD                  | 0.07                     | 1                      | <LOD                    | <LOD                     | 0.01                   | 0.03                   |
| 9-NPH         | <LOD                    | <LOD                    | <LOD                  | <LOD                     | <LOD                   | <LOD                    | <LOD                     | 0.004                  | 0.01                   |
| 2-NBT         | 0.4                     | <LOD                    | <LOD                  | <LOD                     | <LOD                   | <LOD                    | <LOD                     | 0.05                   | 0.2                    |
| 3-NPH         | <LOD                    | 0.01                    | <LOD                  | <LOD                     | <LOD                   | <LOD                    | <LOD                     | 0.001                  | 0.003                  |
| 2-NAN         | <LOD                    | <LOD                    | <LOD                  | <LOD                     | <LOD                   | <LOD                    | <LOD                     | 0.002                  | 0.01                   |
| 2+3-NF        | <LOD                    | <LOD                    | <LOD                  | <LOD                     | <LOD                   | <LOD                    | <LOD                     | 0.02                   | 0.07                   |
| 1-NP          | <LOD                    | <LOD                    | <LOD                  | 0.2                      | 0.3                    | 0.3                     | 0.4                      | 0.02                   | 0.07                   |
| 2-NP          | <LOD                    | <LOD                    | <LOD                  | <LOD                     | <LOD                   | <LOD                    | 0.2                      | 0.05                   | 0.2                    |
| 2,8-DNDB      | <LOD                    | <LOD                    | <LOD                  | <LOD                     | <LOD                   | <LOD                    | <LOD                     | 0.07                   | 0.2                    |
| 7-NBaA        | <LOD                    | <LOD                    | <LOD                  | <LOD                     | <LOD                   | <LOD                    | <LOD                     | 0.007                  | 0.02                   |
| 1-NTR         | <LOD                    | <LOD                    | <LOD                  | <LOD                     | <LOD                   | <LOD                    | <LOD                     | 0.007                  | 0.02                   |
| 6-NCH         | <LOD                    | <LOD                    | <LOD                  | <LOD                     | <LOD                   | <LOD                    | <LOD                     | 0.02                   | 0.07                   |
| 3-NBENZ       | <LOD                    | <LOD                    | <LOD                  | <LOD                     | <LOD                   | <LOD                    | <LOD                     | 0.05                   | 0.2                    |
| 2-NTR         | <LOD                    | <LOD                    | <LOD                  | <LOD                     | <LOD                   | <LOD                    | <LOD                     | 0.02                   | 0.07                   |
| 1,3-DNP       | <LOD                    | 0.4                     | <LOD                  | <LOD                     | 0.3                    | 0.2                     | <LOD                     | 0.05                   | 0.17                   |
| 1,6-DNP       | 3                       | <LOD                    | <LOD                  | 3                        | 5                      | 3                       | <LOD                     | 0.05                   | 0.2                    |
| 1,8-DNP       | 4                       | 10                      | <LOD                  | 6                        | 4                      | 2                       | 2                        | 0.05                   | 0.2                    |
| 6-NBaP        | <LOD                    | <LOD                    | <LOD                  | <LOD                     | <LOD                   | <LOD                    | <LOD                     | 0.07                   | 0.2                    |
| 9-FLU         | 1                       | 11                      | 1                     | 2                        | 3                      | 1                       | 5                        | 0.007                  | 0.02                   |
| PHD           | 0.5                     | 0.1                     | <LOD                  | <LOD                     | 0.4                    | <LOD                    | <LOD                     | 0.05                   | 0.2                    |
| ANQ           | 13                      | 31                      | 1                     | 18                       | 120                    | 2                       | 190                      | 0.007                  | 0.02                   |
| 2-MANQ        | 1                       | 3                       | <LOD                  | 5                        | 13                     | 1                       | 190                      | 0.007                  | 0.02                   |
| BFLN          | 9                       | 13                      | 0.025                 | 52                       | 78                     | 96                      | 115                      | 0.007                  | 0.02                   |



| Sample   | CT-1<br>(mg/kg) | CT-2<br>(mg/kg) | AS<br>(mg/kg) | 1.6 h<br>(mg/kg) | 1 d<br>(mg/kg) | 45 d<br>(mg/kg) | 149 d<br>(mg/kg) | LOD<br>(mg/kg) | LOQ<br>(mg/kg) |
|----------|-----------------|-----------------|---------------|------------------|----------------|-----------------|------------------|----------------|----------------|
| BEN      | 1               | 0.5             | <LOD          | 0.3              | 0.4            | 0.04            | <LOD             | 0.007          | 0.02           |
| ACQN     | <LOD            | <LOD            | <LOD          | <LOQ             | <LOD           | <LOD            | <LOD             | 1.3            | 4.3            |
| BQN+PQN  | 6               | 10              | <LOQ          | 170              | 120            | 190             | 420              | 0.007          | 0.02           |
| BPYN     | <LOD            | 0.25            | <LOD          | 0.1              | 4              | 1               | <LOD             | 0.007          | 0.02           |
| 1,6-BPQN | <LOD            | <LOD            | <LOD          | <LOD             | <LOD           | <LOD            | <LOD             | 0.13           | 0.4            |

66

67 **Table S1.** Mean concentrations (dry weight,  $n = 3$ ) and estimated LOD's and LOQ's of all the compounds detected in pavement  
68 sealcoat products and time point scrapes.

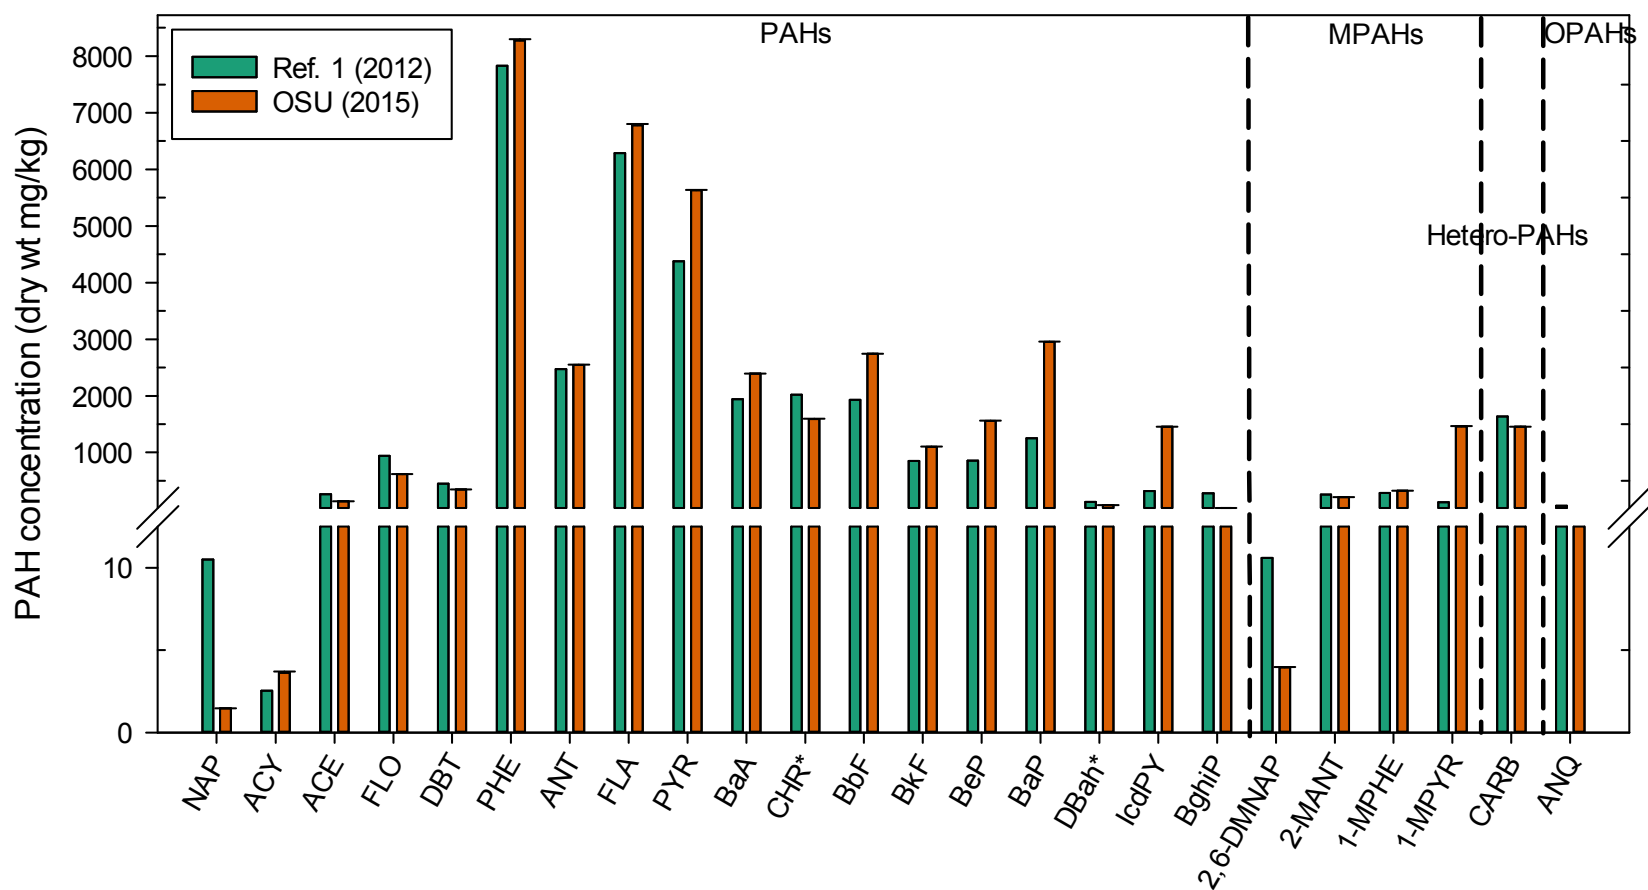

69  
 70 **Figure S1.** Comparison of PAH and PAH derivatives concentrations in the CT-1 product by prior publication<sup>1</sup> and those measured for  
 71 this study. Only compounds that were detected in both studies were included here. CHR and DBahA in prior publication<sup>1</sup> were  
 72 compared to CHR+TRI and DBah+acA concentrations in this study, respectively. Error bars represented standard errors of triplicate  
 73 injections.

| Compounds Group | Compound  | Assigned RPF Value (Draft U.S. EPA RPF) <sup>6</sup> | B[a]P <sub>eq</sub> concentration (mg/kg) |               |             | Assigned PEF Value (Health Canada PEF) <sup>7</sup> | B[a]P <sub>eq</sub> concentration (mg/kg) |              |            |
|-----------------|-----------|------------------------------------------------------|-------------------------------------------|---------------|-------------|-----------------------------------------------------|-------------------------------------------|--------------|------------|
|                 |           |                                                      | CT-1                                      | CT-2          | AS          |                                                     | CT-1                                      | CT-2         | AS         |
| PAHs            | ANH       | 0.4                                                  | 190                                       | 86            | 0.8         | 0.1                                                 | 47                                        | 22           | 0.2        |
|                 | ANT       | 0                                                    | 0                                         | 0             | 0           | NV                                                  | NV                                        | NV           | NV         |
|                 | BaA       | 0.2                                                  | 478                                       | 570           | 0.4         | 0.1                                                 | 239                                       | 285          | 0.2        |
|                 | BaP       | 1                                                    | 2,950                                     | 1,850         | 0.9         | 1                                                   | 2,950                                     | 1,850        | 0.9        |
|                 | BbF       | 0.8                                                  | 2,190                                     | 2,000         | 2.1         | 0.1                                                 | 274                                       | 249          | 0.2        |
|                 | BcFlo     | 20                                                   | 2,370                                     | 3,100         | 25          | NV                                                  | NV                                        | NV           | NV         |
|                 | BghiP     | 0.009                                                | 0.2                                       | 0.6           | 0.01        | 0.01                                                | 0.2                                       | 0.7          | 0.006      |
|                 | Bj+eA     | 60 (from Benz[j]aceanthrylene)                       | 0                                         | 119           | 0           | NV                                                  | NV                                        | NV           | NV         |
|                 | BkF       | 0.03                                                 | 33                                        | 27            | 0.002       | 0.1                                                 | 110                                       | 90           | 0.004      |
|                 | CHR+TRI   | 0.1 (from Chrysene)                                  | 160                                       | 128           | 0.4         | 0.01 (from Chrysene)                                | 16                                        | 13           | 0.03       |
|                 | CPP       | 0.4                                                  | 4                                         | 3.6           | 0           | 0.1                                                 | 1                                         | 0.9          | 0          |
|                 | FLA       | 0.08                                                 | 540                                       | 2,490         | 0.6         | 0.001                                               | 6.8                                       | 31           | 0.003      |
|                 | DBah+acA  | 10 (from Dibenzo[a,h]anthracene)                     | 710                                       | 304           | 0           | 1 (from Dibenzo[a,h]anthracene)                     | 71                                        | 30           | 0          |
|                 | IcdPY     | 0.07                                                 | 102                                       | 68            | 0.06        | 0.1                                                 | 146                                       | 97           | 0.07       |
| PHE             | 0         | 0                                                    | 0                                         | 0             | 0.001       | 8.3                                                 | 45                                        | 0.02         |            |
| PYR             | 0         | 0                                                    | 0                                         | 0             | NV          | NV                                                  | NV                                        | NV           |            |
|                 |           | <b>SUM</b>                                           | 9,730                                     | 10,750        | 30.3        | <b>SUM</b>                                          | 3,870                                     | 2,710        | 1.9        |
| MW302-PAHs      | DBaeF+bkF | 0.9 (from Dibenzo[a,e]fluoranthene)                  | 332                                       | 109           | 0           | 1 (from Dibenzo[a,e]fluoranthene)                   | 370                                       | 121          | 0          |
|                 | DBaeP     | 0.4                                                  | 63                                        | 18            | 0           | 1                                                   | 160                                       | 46           | 0          |
|                 | DBahP     | 0.9                                                  | 220                                       | 97            | 0           | 1                                                   | 246                                       | 107          | 0          |
|                 | DBaiP     | 0.6                                                  | 74                                        | 26            | 0           | 1                                                   | 125                                       | 44           | 0          |
|                 | DBalP     | 30                                                   | 461                                       | 200           | 0           | 100                                                 | 1,540                                     | 667          | 0          |
|                 | N23eP     | 0.3                                                  | 20                                        | 7             | 0           | NV                                                  | NV                                        | NV           | NV         |
|                 |           | <b>SUM</b>                                           | 1,170                                     | 457           | 0           | <b>SUM</b>                                          | 2,430                                     | 985          | 0          |
|                 |           | <b>TOTAL</b>                                         | <b>10,900</b>                             | <b>15,320</b> | <b>30.3</b> | <b>TOTAL</b>                                        | <b>6,310</b>                              | <b>3,700</b> | <b>1.9</b> |

74 **Table S2.** List of PAHs and MW302-PAHs with their corresponding draft RPF and PEF values. NV stands for ‘No Value’.

| Compounds Group | Compound  | Assigned RPF Value (Draft U.S. EPA RPF) <sup>6</sup> | B[a]P <sub>eq</sub> concentration (mg/kg) |               |              |              | Assigned PEF Value (Health Canada PEF) <sup>7</sup> | B[a]P <sub>eq</sub> concentration (mg/kg) |               |              |              |
|-----------------|-----------|------------------------------------------------------|-------------------------------------------|---------------|--------------|--------------|-----------------------------------------------------|-------------------------------------------|---------------|--------------|--------------|
|                 |           |                                                      | 1.6 h                                     | 1 d           | 45 d         | 149 d        |                                                     | 1.6 h                                     | 1 d           | 45 d         | 149 d        |
| PAHs            | ANH       | 0.4                                                  | 1,130                                     | 1,840         | 40           | 10           | 0.1                                                 | 47                                        | 62            | 7            | 9            |
|                 | ANT       | 0                                                    | 0                                         | 0             | 0            | 0            | NV                                                  | NV                                        | NV            | NV           | NV           |
|                 | BaA       | 0.2                                                  | 805                                       | 3,080         | 250          | 150          | 0.1                                                 | 403                                       | 1,540         | 125          | 77           |
|                 | BaP       | 1                                                    | 4,300                                     | 5,170         | 1,900        | 1,800        | 1                                                   | 4,300                                     | 5,170         | 1,900        | 1,800        |
|                 | BbF       | 0.8                                                  | 4,340                                     | 3,710         | 1,650        | 1,850        | 0.1                                                 | 543                                       | 464           | 206          | 231          |
|                 | BcFlo     | 20                                                   | 2,730                                     | 4,180         | 1,600        | 1,240        | NV                                                  | NV                                        | NV            | NV           | NV           |
|                 | BghiP     | 0.009                                                | 0.1                                       | 2.5           | 0.4          | 0.03         | 0.01                                                | 0.1                                       | 2.7           | 0.5          | 0.03         |
|                 | Bj+eA     | 60 (from Benz[j]aceanthrylene)                       | 0                                         | 0             | 0            | 0            | NV                                                  | NV                                        | NV            | NV           | NV           |
|                 | BkF       | 0.03                                                 | 60                                        | 60            | 27           | 28           | 0.1                                                 | 197                                       | 187           | 89           | 94           |
|                 | CHR+TRI   | 0.1 (from Chrysene)                                  | 310                                       | 370           | 150          | 140          | 0.01 (from Chrysene)                                | 31                                        | 37            | 15           | 14           |
|                 | CPP       | 0.4                                                  | 1.2                                       | 1.5           | 0.7          | 2.6          | 0.1                                                 | 0.3                                       | 0.4           | 0.2          | 0.7          |
|                 | FLA       | 0.08                                                 | 1,570                                     | 5,650         | 510          | 390          | 0.001                                               | 20                                        | 71            | 6            | 5            |
|                 | DBah+acA  | 10 (from Dibenzo[a,h]anthracene)                     | 400                                       | 515           | 190          | 270          | 1 (from Dibenzo[a,h]anthracene)                     | 40                                        | 52            | 19           | 27           |
|                 | IcdPY     | 0.07                                                 | 70                                        | 160           | 40           | 50           | 0.1                                                 | 101                                       | 225           | 61           | 75           |
| PHE             | 0         | 0                                                    | 0                                         | 0             | 0            | 0.001        | 16                                                  | 56                                        | 2.3           | 1.2          |              |
| PYR             | 0         | 0                                                    | 0                                         | 0             | 0            | NV           | NV                                                  | NV                                        | NV            | NV           |              |
|                 |           | <b>SUM</b>                                           | 15,700                                    | 24,700        | 6,370        | 5,960        | <b>SUM</b>                                          | 8,440                                     | 12,050        | 4,040        | 3,600        |
| MW302-PAHs      | DBaeF+bkF | 0.9 (from Dibenzo[a,e]fluoranthene)                  | 325                                       | 250           | 195          | 250          | 1 (from Dibenzo[a,e]fluoranthene)                   | 361                                       | 280           | 216          | 282          |
|                 | DBaeP     | 0.4                                                  | 60                                        | 40            | 33           | 43           | 1                                                   | 146                                       | 97            | 83           | 109          |
|                 | DBahP     | 0.9                                                  | 63                                        | 37            | 23           | 26           | 1                                                   | 69                                        | 41            | 25           | 29           |
|                 | DBaiP     | 0.6                                                  | 48                                        | 37            | 23           | 26           | 1                                                   | 80                                        | 61            | 38           | 44           |
|                 | DBalP     | 30                                                   | 401                                       | 225           | 39           | 31           | 100                                                 | 1,340                                     | 751           | 130          | 104          |
|                 | N23eP     | 0.3                                                  | 22                                        | 16            | 12           | 14           | NV                                                  | NV                                        | NV            | NV           | NV           |
|                 |           | <b>SUM</b>                                           | 917                                       | 607           | 325          | 395          | <b>SUM</b>                                          | 2,000                                     | 1,230         | 493          | 568          |
|                 |           | <b>TOTAL</b>                                         | <b>16,600</b>                             | <b>25,300</b> | <b>6,690</b> | <b>6,350</b> | <b>TOTAL</b>                                        | <b>10,440</b>                             | <b>13,280</b> | <b>4,530</b> | <b>4,170</b> |

75 **Table S3.** List of PAHs and MW302-PAHs with their corresponding draft RPF and PEF values. NV stands for ‘No Value’.

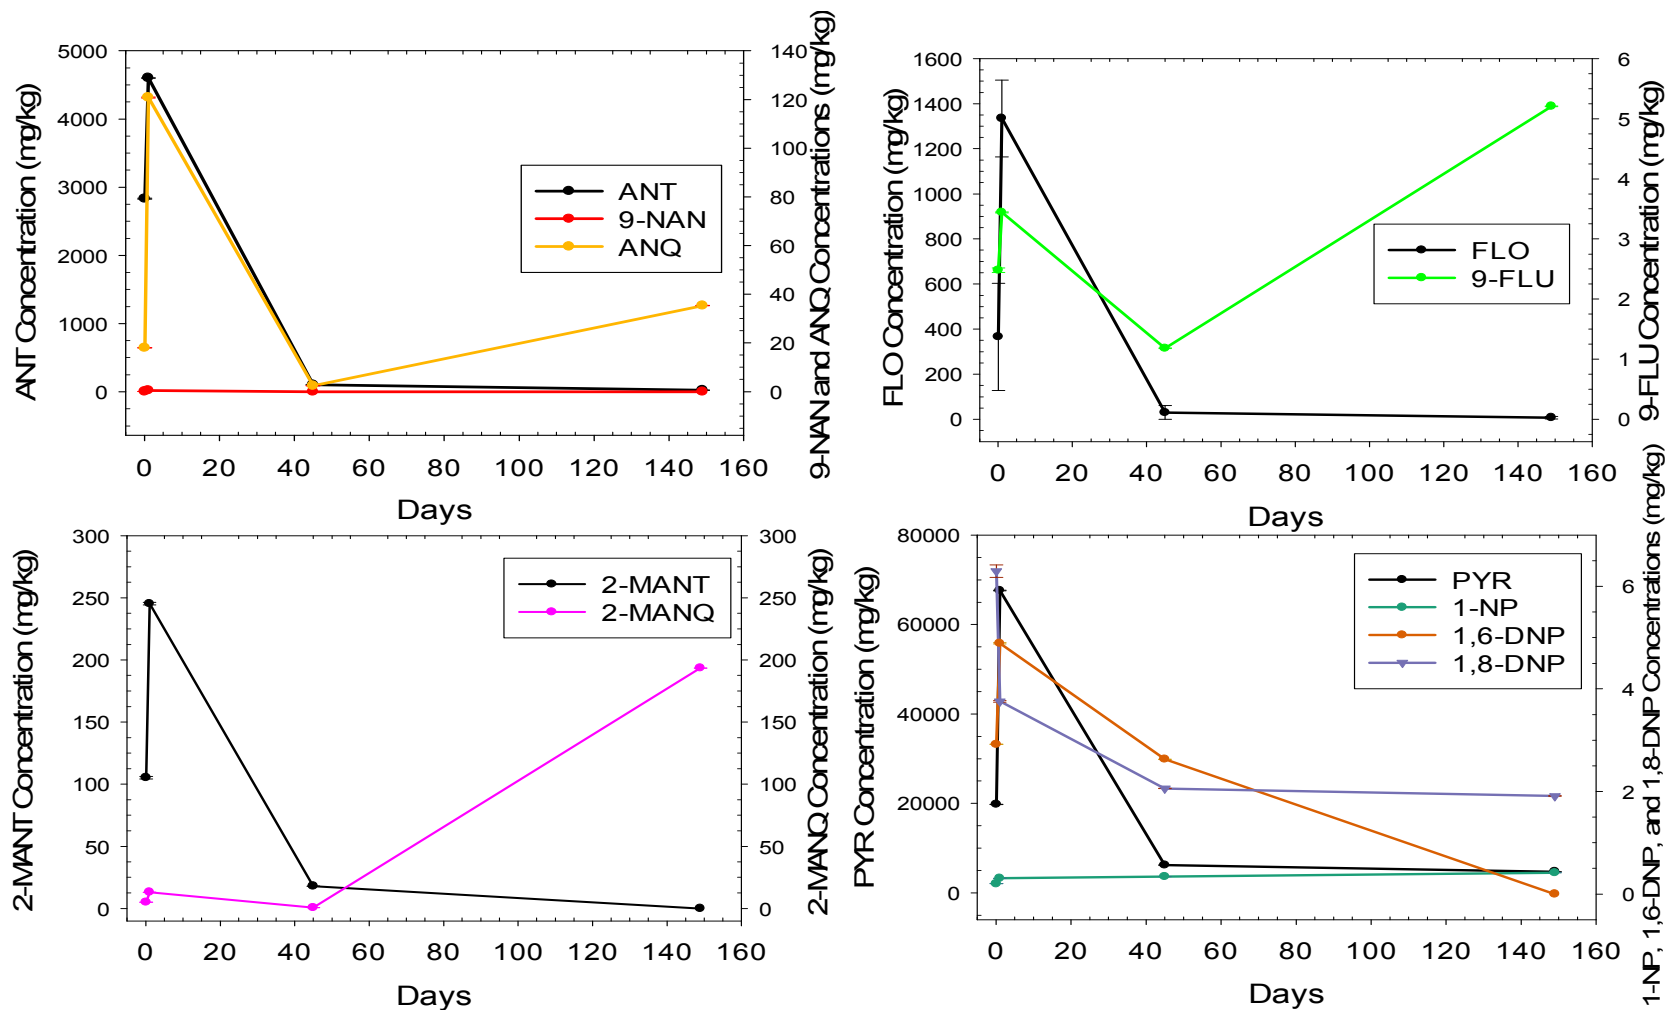

76  
 77 **Figure S2.** Concentration of PAHs and MPAHs and their Nitro- and Oxy-PAHs derivative products post pavement sealcoat  
 78 application.

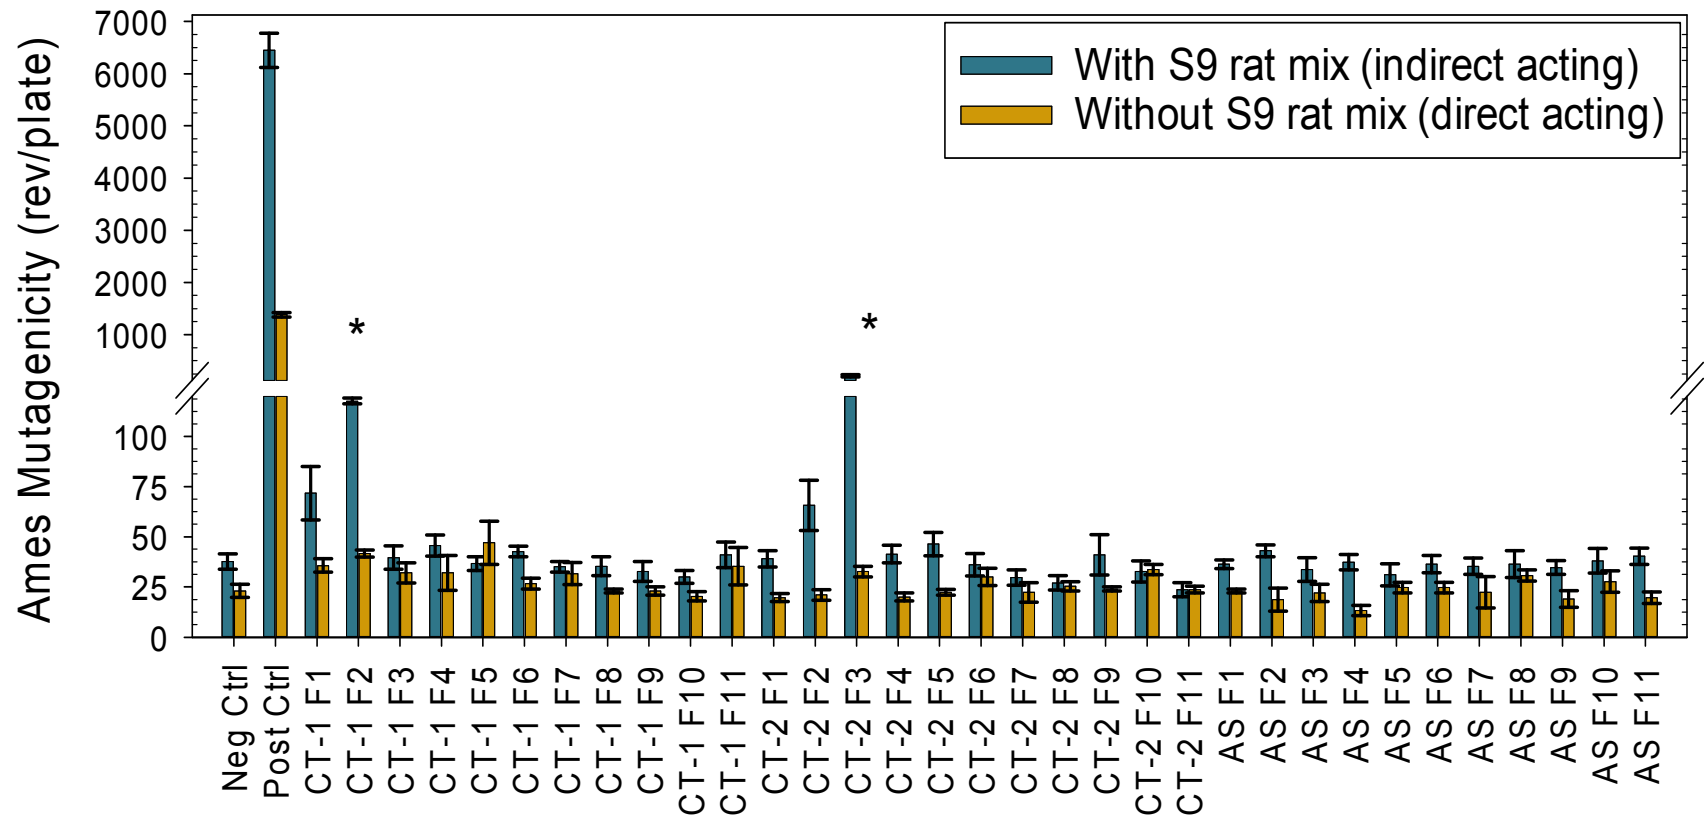

79  
 80 **Figure S3.** Mutagenicity data of F1-F11 for the pavement sealcoat products analyzed at 1:100 dilution. The blue shade illustrates the  
 81 indirect acting mutagenicity and the light orange shade illustrates the direct acting mutagenicity. \* denotes significance from negative  
 82 control ( $p < 0.05$ ). Error bars represent one standard deviation.

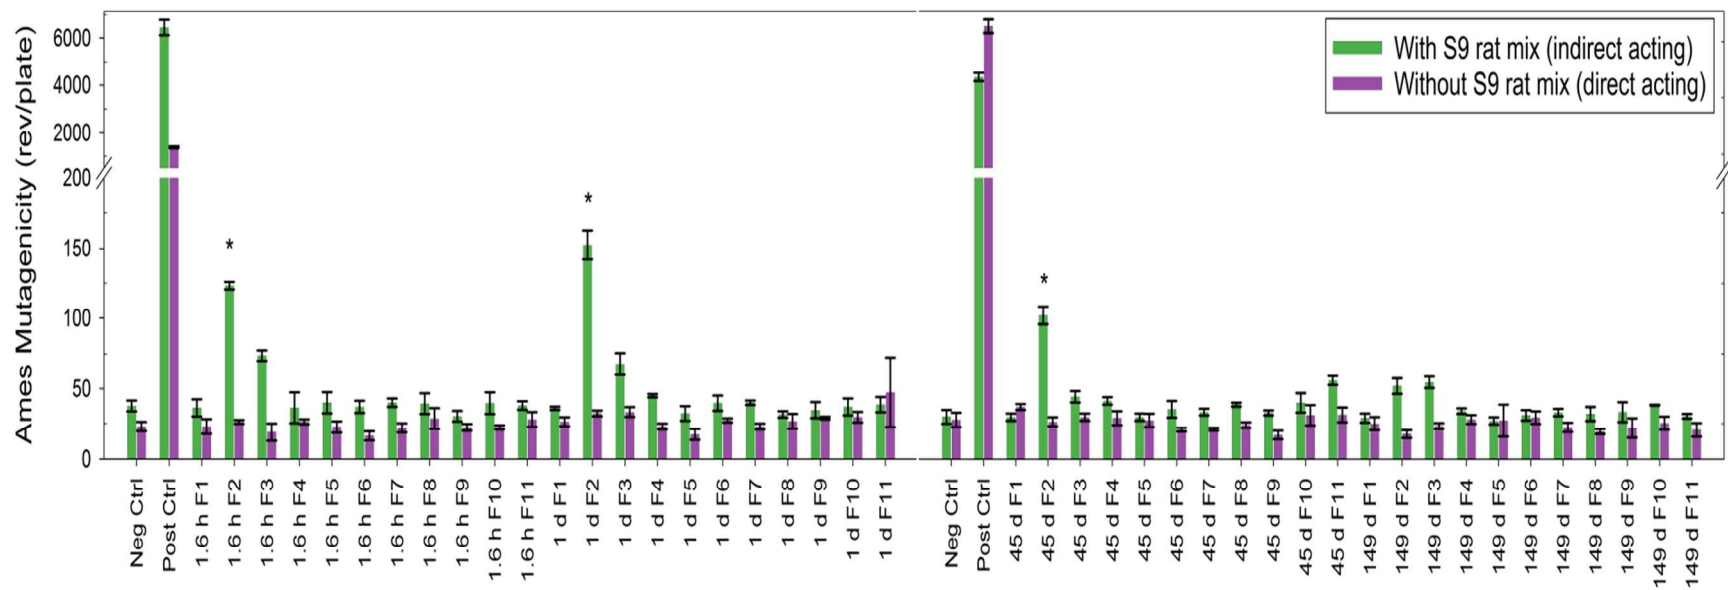

83  
 84 **Figure S4.** Mutagenicity data of F1-F11 for time point scrapes analyzed at 1:100 dilution. The green shade illustrates the indirect  
 85 acting mutagenicity and the purple illustrates the direct acting mutagenicity. \* denotes significance from negative control ( $p < 0.05$ ).  
 86 Error bars represent one standard deviation.

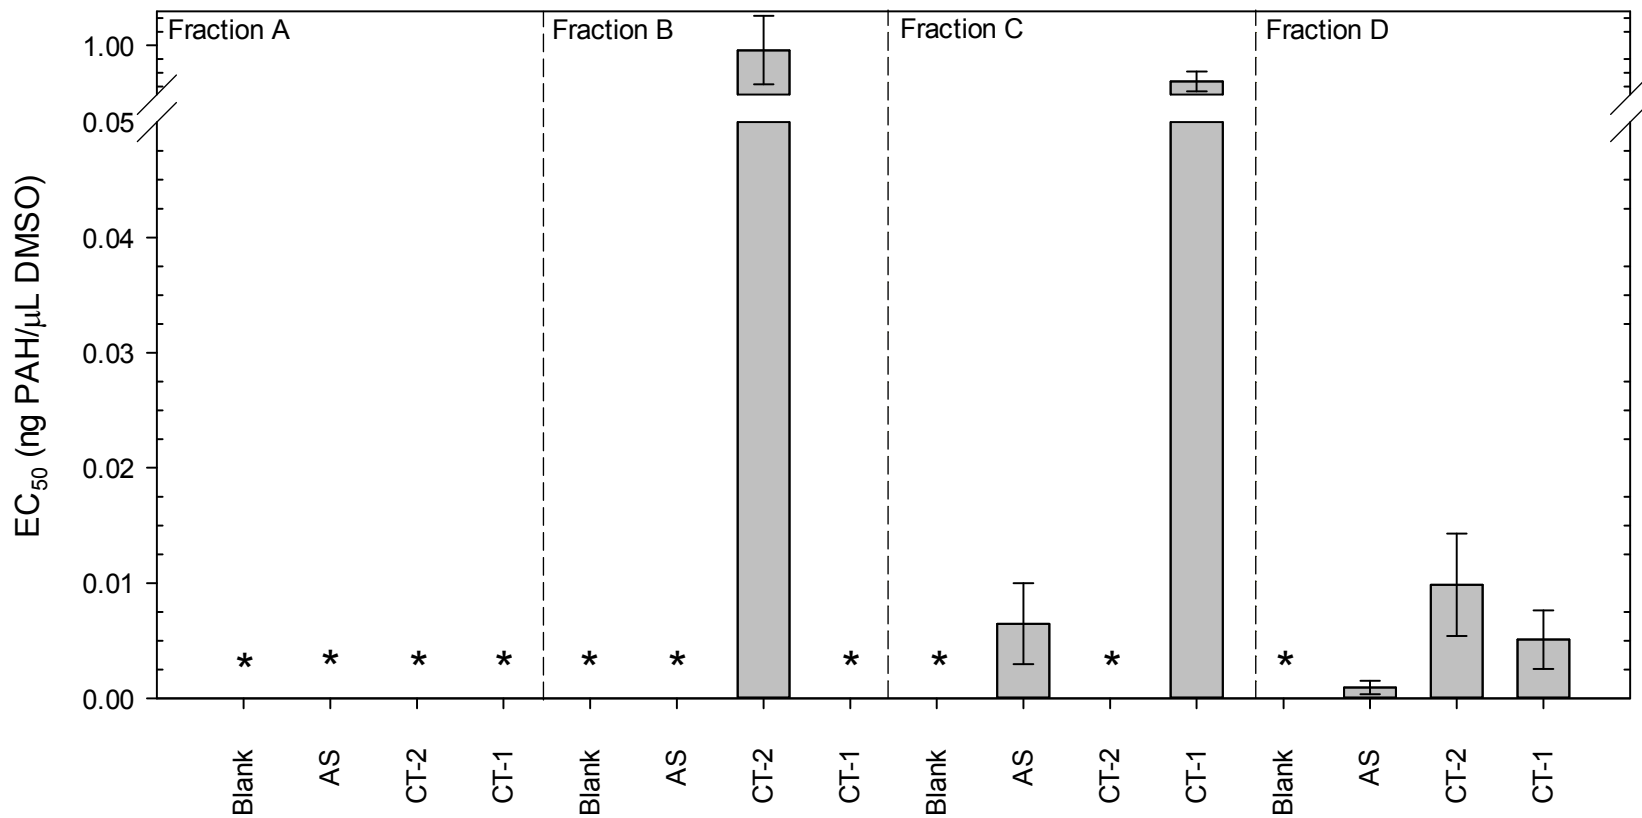

87  
 88 **Figure S5.** EC<sub>50</sub> concentration of pavement sealcoat products calculated based on the lowest effect level (LEL) of “any effect” in the  
 89 zebrafish developmental toxicity test. Error bars represent standard errors and \* denotes no toxicity observed (i.e. no calculated EC<sub>50</sub>).



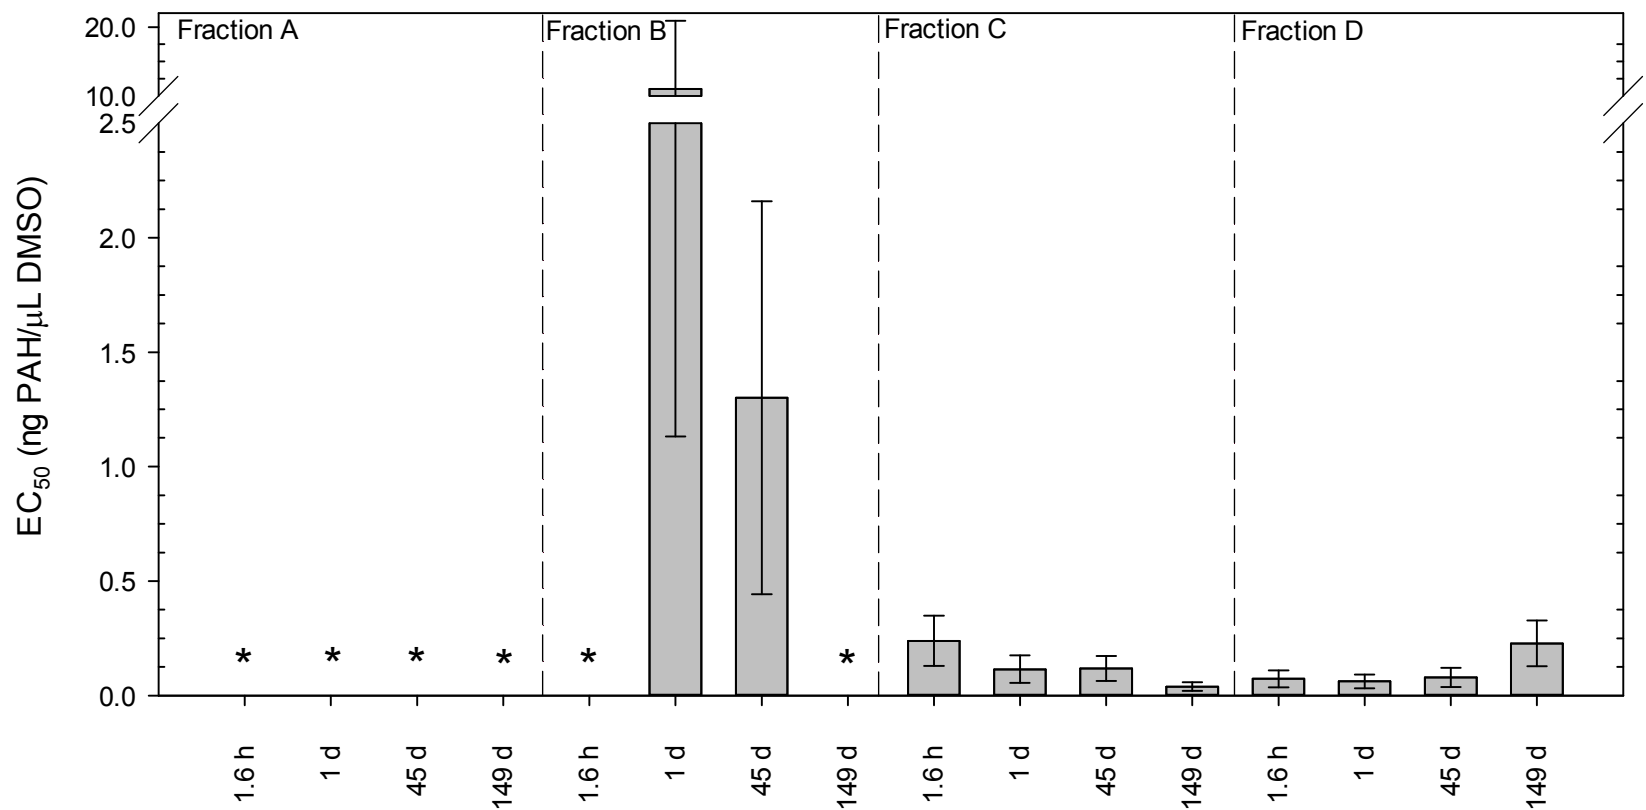

90  
 91 **Figure S6.** EC<sub>50</sub> concentration of CT-1 time point scrapes calculated based on the lowest effect level (LEL) of “any effect” in the  
 92 zebrafish developmental toxicity test. Error bars represent standard errors and \* denotes no toxicity observed (i.e. no calculated EC<sub>50</sub>).

## Reference

- 94 (1) Van Metre, P. C.; Majewski, M. S.; Mahler, B. J.; Foreman, W. T.; Braun, C. L.; Wilson,  
95 J. T.; Burbank, T. L. PAH Volatilization Following Application of Coal-Tar-Based  
96 Pavement Sealant. *Atmos. Environ.* **2012**, *51*, 108–115.
- 97 (2) Wang, W.; Jariyasopit, N.; Schrlau, J.; Jia, Y.; Tao, S.; Yu, T.-W.; Dashwood, R. H.;  
98 Zhang, W.; Wang, X.; Simonich, S. L. M. Concentration and Photochemistry of PAHs,  
99 NPAHs, and OPAHs and Toxicity of PM<sub>2.5</sub> During the Beijing Olympic Games. *Environ.*  
100 *Sci. Technol.* **2011**, *45*, 6887–6895.
- 101 (3) Jariyasopit, N.; Zimmermann, K.; Schrlau, J.; Arey, J.; Atkinson, R.; Yu, T.-W.;  
102 Dashwood, R. H.; Tao, S.; Simonich, S. L. M. Heterogeneous Reactions of Particulate  
103 Matter-Bound PAHs and NPAHs with NO<sub>3</sub>/N<sub>2</sub>O<sub>5</sub>, OH Radicals, and O<sub>3</sub> Under Simulated  
104 Long-Range Atmospheric Transport Conditions: Reactivity and Mutagenicity. *Environ.*  
105 *Sci. Technol.* **2014**, *48*, 10155–10164.
- 106 (4) Jia, Y.; Stone, D.; Wang, W.; Schrlau, J.; Tao, S.; Simonich, S. L. M. Estimated Reduction  
107 in Cancer Risk Due to PAH Exposures if Source Control Measures During the 2008  
108 Beijing Olympics were Sustained. *Environ. Health Perspect.* **2011**, *119*, 815–820.
- 109 (5) Schubert, P.; Schantz, M. M.; Sander, L. C.; Wise, S. A. Determination of Polycyclic  
110 Aromatic Hydrocarbons with Molecular Weight 300 and 302 in Environmental-Matrix  
111 Standard Reference Materials by Gas Chromatography/Mass Spectrometry. *Anal. Chem.*  
112 **2003**, *75*, 234–246.
- 113 (6) U.S. EPA; Integrated Risk Information System. *Development of a Relative Potency Factor*  
114 *(RPF) Approach for Polycyclic Aromatic Hydrocarbon (PAH) Mixtures: In Support of*  
115 *Summary Information on the Integrated Risk Information System (IRIS)*;  
116 RPA/635/R-08/012A; Washington, D.C., 2010.  
117 [http://cfpub.epa.gov/ncea/iris\\_drafts/recordisplay.cfm?deid=194584](http://cfpub.epa.gov/ncea/iris_drafts/recordisplay.cfm?deid=194584) (accessed June 1,  
118 2015).
- 119 (7) Health Canada. *Federal Contaminated Site Risk Assessment in Canada, Part I: Guidance*  
120 *on Human Health Preliminary Quantitative Risk Assessment (PQRA), version 2.0*;  
121 Contaminated Sites - Reports and Publications; H128-1/11-632E-PDF; Minister of Health,  
122 Government of Canada: Ottawa, Ontario, Canada, 2005. [http://www.hc-sc.gc.ca/ewh-  
124 semt/pubs/contamsite/part-partie\\_i/index-eng.php](http://www.hc-sc.gc.ca/ewh-<br/>123 semt/pubs/contamsite/part-partie_i/index-eng.php) (accessed February 19, 2016).
